# Supplementary material
Source: Frontiers journal article supplement (https://www.frontiersin.org/articles/164377)
Supplement: Image_1.PDF [file Image_1.PDF]

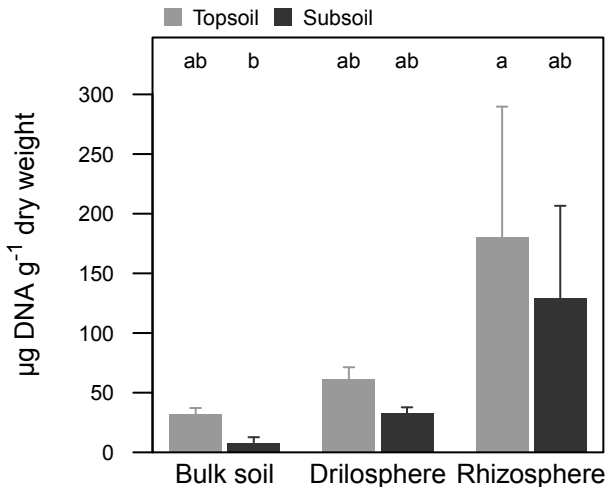

**Figure S1:** Biomass in different soil compartments and depth layers as estimated by DNA content.
