# Supplementary material
Source: Frontiers journal article supplement (https://www.frontiersin.org/articles/164377)
Supplement: Image_2.PDF [file Image_2.PDF]

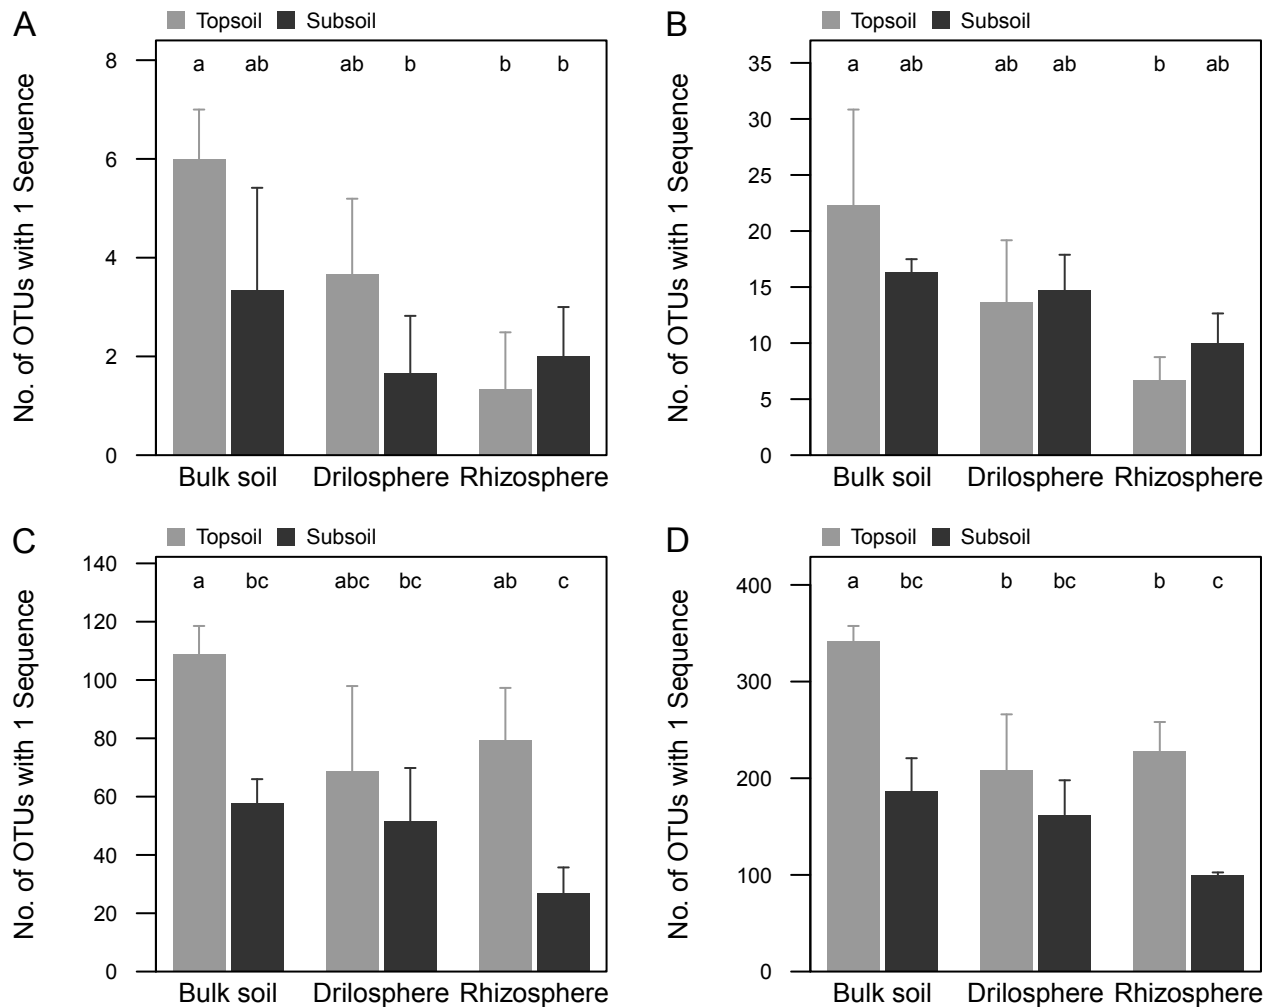

**Figure S2:** Count of singletons from archaeal (A, B) and bacterial (C, D) OTUs at 90% (A, C) and 95% (B, D) similarity level. Different letters indicate significant differences ( $P \leq 0.05$ ).
