# Supplementary material
Source: Frontiers journal article supplement (https://www.frontiersin.org/articles/164377)
Supplement: Image_4.PDF [file Image_4.PDF]

**A**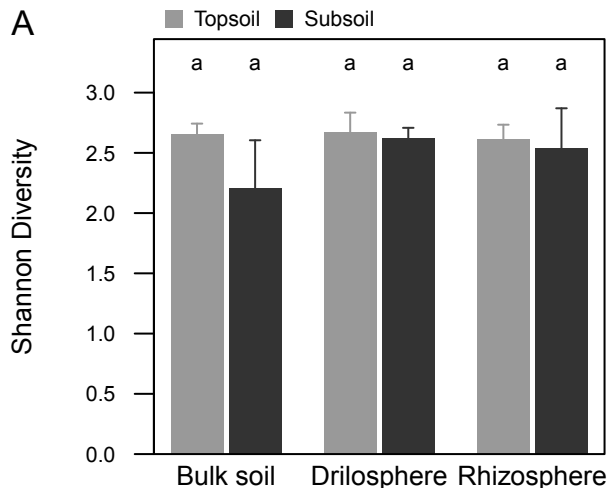**B**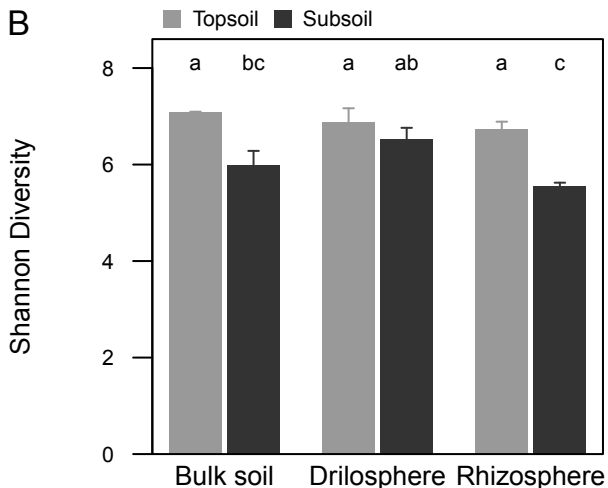

**Figure S4:** Shannon diversity index at 95% similarity level of archaea (A) and bacteria (B) in soil compartments of topsoil and subsoil. Different letters indicate significant differences ( $P \leq 0.05$ ).
