# Supplementary material
Source: Frontiers journal article supplement (https://www.frontiersin.org/articles/164377)
Supplement: Image_5.PDF [file Image_5.PDF]

## Adjusted abundance

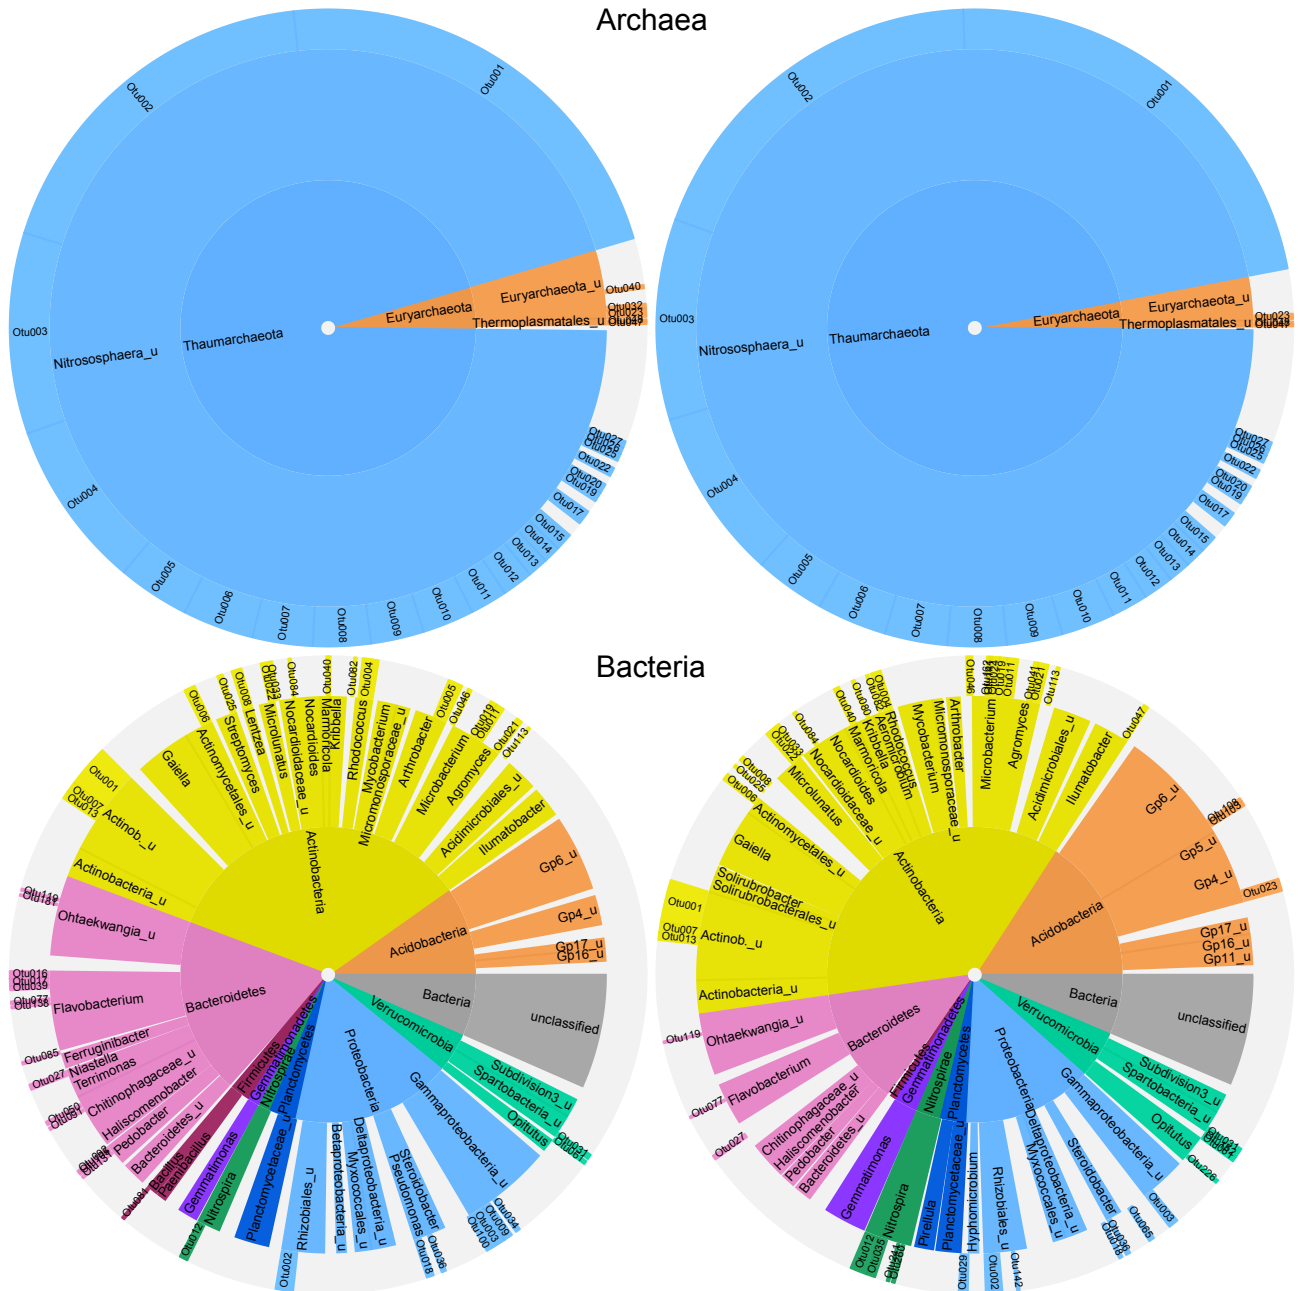

**Figure S5:** Estimation of the real abundance of archaea and bacteria from 16S rRNA gene copy numbers over all samples. Adjustment of the abundance was performed by information of varying 16S rRNA gene copy numbers per genome at *rmnDB*. OTUs were clustered at 95% similarity level and only OTUs with a relative abundance  $\geq 1.5\%$  in at least one of all samples are displayed. Inner ring - phylum level; middle ring - genus or nearest classifiable level.
