# Supplementary material
Source: Frontiers journal article supplement (https://www.frontiersin.org/articles/164377)
Supplement: Image_9.PDF [file Image_9.PDF]

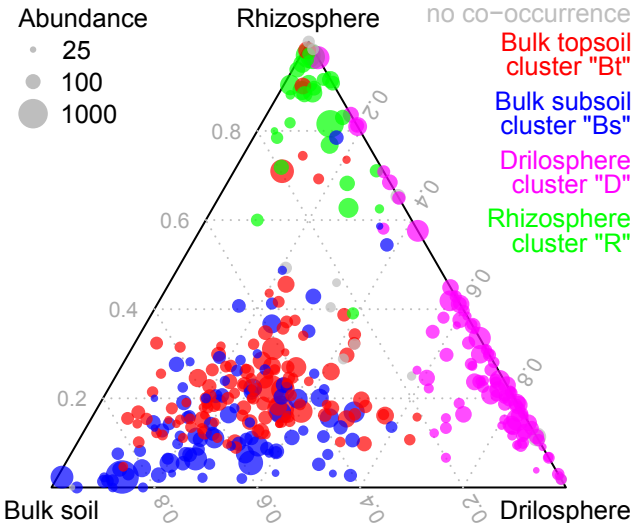

**Figure S9:** Distribution of bacterial OTUs between soil compartments and their affiliation to clusters of co-occurring OTUs according to cluster analysis at 95% similarity level.
